# Supplementary material for: Epitope profiling using computational structural modelling demonstrated on coronavirus-binding antibodies
Source: PubMed Central journal article supplement (PMC8700021; doi:10.1371/journal.pcbi.1009675), 2021-12-13
Supplement: pcbi.1009675.s002.pdf [file pcbi.1009675.s002.pdf]

| Antibody                 | PDB Code | Citation | Epitope Cluster |
|--------------------------|----------|----------|-----------------|
| B38                      | 7BZ5     | [1]      | Neck            |
| Bamlanivimab (LY-CoV555) | 7KMG     | [2]      | *Left Shoulder  |
| BD-236                   | 7CHB     | [3]      | Neck            |
| BD-368-2                 | 7CHC     | [3]      | Left Shoulder   |
| BD-604                   | 7CHF     | [3]      | Neck            |
| BD-629                   | 7CH5     | [3]      | Neck            |
| C102                     | 7K8M     | [4]      | *Neck           |
| C1A-B3                   | 7KFW     | [5]      | *Neck           |
| C1A-B12                  | 7KFV     | [5]      | *Neck           |
| C1A-C2                   | 7KFX     | [5]      | *Neck           |
| C1A-F10                  | 7KFY     | [5]      | *Neck           |
| CB6                      | 7C01     | [6]      | Neck            |
| CC12.1                   | 6XC2     | [7]      | Neck            |
| CC12.3                   | 6XC4     | [7]      | Neck            |
| COVA1-16                 | 7JMW     | [8, 9]   | Left Flank      |
| COVA2-04                 | 7JMO     | [8, 10]  | Neck            |
| COVA2-39                 | 7JMP     | [8, 10]  | Right Shoulder  |
| COVOX-45                 | 7BEL     | [11]     | Right Flank     |
| COVOX-75                 | 7BEO     | [11]     | Right Shoulder  |
| COVOX-88                 | 7BEL     | [11]     | Left Shoulder   |
| COVOX-150                | 7BEI     | [11]     | Neck            |
| COVOX-158                | 7BEJ     | [11]     | Neck            |
| COVOX-253                | 7BEN     | [11]     | Left Shoulder   |
| COVOX-253H55L            | 7BEO     | [11]     | Left Shoulder   |
| COVOX-269                | 7BEM     | [11]     | Neck            |
| COVOX-316                | 7BEH     | [11]     | Left Shoulder   |
| COVOX-384                | 7BEP     | [11]     | Left Shoulder   |
| CR3022                   | 7JN5     | [12, 13] | Left Flank      |
| CV07-250                 | 6XKQ     | [14]     | Right Shoulder  |
| CV07-270                 | 6XKP     | [14]     | Left Shoulder   |
| CV30                     | 6XE1     | [15, 16] | Neck            |
| EY6A                     | 6ZER     | [17]     | Left Flank      |
| Fab_15033-7              | 7KLH     | [18]     | *Right Shoulder |
| Fab-52                   | 7K9Z     | [19]     | *Left Shoulder  |
| Fab-298                  | 7K9Z     | [19]     | *Right Shoulder |
| Fab2-15                  | 7L5B     | [20, 21] | *Shoulder       |
| LY-CoV481                | 7KMI     | [2]      | Neck            |
| LY-CoV488                | 7KMH     | [2]      | Neck            |
| MW06                     | 7DPM     | [22]     | *Left Flank     |
| P4A1                     | 7CJF     | [23]     | Neck            |
| P2B-2F6                  | 7BWJ     | [24]     | Left Shoulder   |
| P2C-1F11                 | 7CDI     | [25]     | *Neck           |
| P2C-1A3                  | 7CDJ     | [26]     | *Shoulder       |
| Regdanvimab              | 7CM4     | [27]     | *Right Shoulder |
| S2H14                    | 7JX3     | [28]     | Right Shoulder  |
| S304                     | 7LON     | [29, 28] | Left Flank      |
| S309                     | 7JX3     | [29, 28] | Right Flank     |
| STE90-C11                | 7B30     | [30]     | *Neck           |

**S1 Table. SARS-CoV-2 binding antibodies.** Antibodies with a solved crystal structures in complex with a SARS-CoV-2 antigen. Antibodies were assigned to their nearest epitope cluster, as defined by Dejnirattisai *et al.* [11]. Antibodies whose epitope cluster is labelled with a star (\*) were not included in the previous analysis by Dejnirattisai *et al.* [11]. The new cluster label ‘Shoulder’ indicates that antibody’s epitope lies between the left and right shoulder clusters.

# Bibliography

1. Wu Y, Wang F, Shen C, Peng W, Li D, et al. A noncompeting pair of human neutralizing antibodies block COVID-19 virus binding to its receptor ACE2. *Science*. 2020;368(6496):1274–1278. doi:10.1126/science.abc2241.
2. Jones BE, Brown-Augsburger PL, Corbett KS, Westerndorf K, Davies J, et al. The neutralizing antibody, LY-CoV555, protects against SARS-CoV-2 infection in non-human primates. *Sci Transl Med*. 2021; p. eabf1906. doi:10.1126/scitranslmed.abf1906.
3. Du S, Cao Y, Zhu Q, Wang G, Du X, et al. Structures of potent and convergent neutralizing antibodies bound to the SARS-CoV-2 spike unveil a unique epitope responsible for exceptional potency. *bioRxiv*. 2020;doi:10.1101/2020.07.09.195263.
4. Robbiani DF, Gaebler C, Muecksch F, Lorenzi JC, Wang Z, et al. Convergent antibody responses to SARS-CoV-2 in convalescent individuals. *Nature*. 2020;584(7821):437–442. doi:10.1038/s41586-020-2456-9.
5. Clark SA, Clark LE, Pan J, Coscia A, McKay LG, et al. Molecular basis for a germline-biased neutralizing antibody response to SARS-CoV-2. *bioRxiv*. 2020;doi:10.1101/2020.11.13.381533.
6. Shi R, Shan C, Duan X, Chen Z, Liu P, et al. A human neutralizing antibody targets the receptor-binding site of SARS-CoV-2. *Nature*. 2020;584(7819):120–124. doi:10.1038/s41586-020-2381-y.
7. Rogers TF, Zhao F, Huang D, Beutler N, Burns A, et al. Isolation of potent SARS-CoV-2 neutralizing antibodies and protection from disease in a small animal model. *Science*. 2020;369(6506):956–963. doi:10.1126/science.abc7520.
8. Brouwer PJ, Caniels TG, van der Straten K, Snitselaar JL, Aldon Y, et al. Potent neutralizing antibodies from COVID-19 patients define multiple targets of vulnerability. *Science*. 2020;369(6504):643–650. doi:10.1126/science.abc5902.
9. Liu H, Wu NC, Yuan M, Bangaru S, Torres JL, et al. Cross-neutralization of a SARS-CoV-2 antibody to a functionally conserved site is mediated by avidity. *Immunity*. 2020;53(6):1272–1280. doi:10.1016/j.immuni.2020.10.023.
10. Wu NC, Yuan M, Liu H, Lee CCD, Zhu X, Bangaru S, et al. An alternative binding mode of IGHV3-53 antibodies to the SARS-CoV-2 receptor binding domain. *Cell Rep*. 2020;33(3):108274. doi:10.1016/j.celrep.2020.108274.
11. Dejnirattisai W, Zhou D, Ginn HM, Duyvesteyn HM, Supasa P, et al. The antigenic anatomy of SARS-CoV-2 receptor binding domain. *Cell*. 2021;doi:10.1016/j.cell.2021.02.032.
12. Ter Meulen J, Van Den Brink EN, Poon LL, Marissen WE, Leung CS, et al. Human monoclonal antibody combination against SARS coronavirus: synergy and coverage of escape mutants. *PLoS Med*. 2006;3(7):e237. doi:10.1371/journal.pmed.0030237.
13. Wu NC, Yuan M, Bangaru S, Huang D, Zhu X, et al. A natural mutation between SARS-CoV-2 and SARS-CoV determines neutralization by a cross-reactive antibody. *PLoS Pathog*. 2020;16(12):e1009089. doi:10.1371/journal.ppat.1009089.
14. Kreye J, Reincke SM, Kornau HC, Sánchez-Sendin E, Corman VM, et al. A SARS-CoV-2 neutralizing antibody protects from lung pathology in a COVID-19 hamster model. *Cell*. 2020;183(4):1058–1069. doi:10.1016/j.cell.2020.09.049.
15. Seydoux E, Homad LJ, MacCamy AJ, Parks KR, Hurlburt NK, et al. Characterization of neutralizing antibodies from a SARS-CoV-2 infected individual. *bioRxiv*. 2020;doi:10.1101/2020.05.12.091298.
16. Hurlburt NK, Seydoux E, Wan YH, Edara VV, Stuart AB, et al. Structural basis for potent neutralization of SARS-CoV-2 and role of antibody affinity maturation. *Nat Commun*. 2020;11(1):5413. doi:10.1038/s41467-020-19231-9.
17. Zhou D, Duyvesteyn HM, Chen CP, Huang CG, Chen TH, et al. Structural basis for the neutralization of SARS-CoV-2 by an antibody from a convalescent patient. *Nat Struct Mol Biol*. 2020;27(10):950–958. doi:10.1038/s41594-020-0480-y.
18. Miersch S, Li Z, Saberianfar R, Ustav M, Case JB, et al. Tetravalent SARS-CoV-2 Neutralizing Antibodies Show Enhanced Potency and Resistance to Escape Mutations. *bioRxiv*. 2020;doi:10.1101/2020.10.31.362848.

19. Rujas E, Kucharska I, Tan YZ, Benlekbir S, Cui H, et al. Multivalency transforms SARS-CoV-2 antibodies into broad and ultrapotent neutralizers. *bioRxiv*. 2020;doi:10.1101/2020.10.15.341636.
20. Liu L, Wang P, Nair MS, Yu J, Rapp M, et al. Potent neutralizing antibodies against multiple epitopes on SARS-CoV-2 spike. *Nature*. 2020;584(7821):450–456. doi:10.1038/s41586-020-2571-7.
21. Rapp M, Guo Y, Reddem ER, Liu L, Wang P, et al. Modular basis for potent SARS-CoV-2 neutralization by a prevalent VH1-2-derived antibody class. *Cell Rep*. 2021;35(1):108950. doi:10.1016/j.celrep.2021.108950.
22. Wang J, Jiao S, Wang R, Zhang J, Zhang M, et al. Crystal structure of SARS-CoV-2 Spike RBD in complex with MW06 Fab. 2020;doi:10.2210/pdb7DPM/pdb.
23. Guo Y, Huang L, Zhang G, Yao Y, Zhou H, Shen S, et al. A SARS-CoV-2 neutralizing antibody with exceptional spike binding coverage and optimized therapeutic potentials. *Research Square (Nature Preprint)*. 2020;doi:10.21203/rs.3.rs-78945/v1.
24. Ju B, Zhang Q, Ge J, Wang R, Sun J, et al. Human neutralizing antibodies elicited by SARS-CoV-2 infection. *Nature*. 2020;584(7819):115–119. doi:10.1038/s41586-020-2380-z.
25. Wang X, Zhang L, Ge J, Wang R. Crystal structure of SARS-CoV-2 antibody P2C-1F11 and RBD. 2020;doi:10.2210/pdb7CDI/pdb.
26. Wang X, Ge J. Crystal structure of SARS-CoV-2 antibody P2C-1A3 and RBD. 2020;doi:10.2210/pdb7CDJ/pdb.
27. Kim C, Ryu DK, Lee J, Kim YI, Seo JM, et al. A therapeutic neutralizing antibody targeting receptor binding domain of SARS-CoV-2 spike protein. *Nat Commun*. 2021;12(1):288. doi:10.1038/s41467-020-20602-5.
28. Piccoli L, Park YJ, Tortorici MA, Czudnochowski N, Walls AC, et al. Mapping neutralizing and immunodominant sites on the SARS-CoV-2 spike receptor-binding domain by structure-guided high-resolution serology. *Cell*. 2020;183(4):1024–1042. doi:10.1016/j.cell.2020.09.037.
29. Pinto D, Park YJ, Beltramello M, Walls AC, Tortorici MA, et al. Cross-neutralization of SARS-CoV-2 by a human monoclonal SARS-CoV antibody. *Nature*. 2020;583(7815):290–295. doi:10.1038/s41586-020-2349-y.
30. Bertoglio F, Fühner V, Ruschig M, Heine PA, Rand U, et al. A SARS-CoV-2 neutralizing antibody selected from COVID-19 patients by phage display is binding to the ACE2-RBD interface and is tolerant to known RBD mutations. *bioRxiv*. 2020;doi:10.1101/2020.12.03.409318.
