# Supplementary material for: Epitope profiling using computational structural modelling demonstrated on coronavirus-binding antibodies
Source: PubMed Central journal article supplement (PMC8700021; doi:10.1371/journal.pcbi.1009675), 2021-12-13
Supplement: pcbi.1009675.s003.pdf [file pcbi.1009675.s003.pdf]

| Nanobody  | PDB Code | Citation | Epitope Cluster |
|-----------|----------|----------|-----------------|
| H11-D4    | 6YZ5     | [1]      | *Left Shoulder  |
| H11-H4    | 6ZBP     | [1]      | *Left Shoulder  |
| MR17      | 7C8W     | [2, 3]   | *Shoulder       |
| MR17_K99Y | 7CAN     | [2]      | *Shoulder       |
| Nb20      | 7JVB     | [4]      | *Shoulder       |
| SR4       | 7C8V     | [2]      | *Left Shoulder  |
| SR31      | 7D2Z     | [2]      | *Left Shoulder  |
| VHH-72    | 6WAQ     | [5]      | *Left Flank     |
| VHH_E     | 7KN5     | [6]      | Left Shoulder   |
| VHH_U     | 7KN5     | [6]      | *Left Flank     |
| VHH_V     | 7KN6     | [6]      | *Left Flank     |
| VHH_W     | 7KN7     | [6]      | *Left Flank     |

**S2 Table. SARS-CoV-2 binding Nanobodies.** Nanobodies with a solved crystal structures in complex with a SARS-CoV-2 antigen. Nanobodies were assigned to their nearest epitope cluster, as defined by Dejnirattisai *et al.* [7]. Nanobodies whose epitope cluster is labelled with a star (\*) were not included in the previous analysis by Dejnirattisai *et al.* [7]. The new cluster label ‘Shoulder’ indicates that antibody’s epitope lies between the left and right shoulder clusters.

## References

1. Huo J, Le Bas A, Ruza RR, Duyvesteyn HM, Mikolajek H, et al. Neutralizing nanobodies bind SARS-CoV-2 spike RBD and block interaction with ACE2. *Nat Struct Mol Biol.* 2020;27(9):846–854. doi:10.1038/s41594-020-0469-6.
2. Li T, Cai H, Yao H, Zhou B, Zhao Y, et al. A potent synthetic nanobody targets RBD and protects mice from SARS-CoV-2 infection. *BioRxiv.* 2020;doi:10.1101/2020.06.09.143438.
3. Yao H, Cai H, Li T, Zhou B, Qin W, et al. A high-affinity RBD-targeting nanobody improves fusion partner’s potency against SARS-CoV-2. *PLoS Pathog.* 2021;17(3):e1009328. doi:10.1371/journal.ppat.1009328.
4. Xiang Y, Nambulli S, Xiao Z, Liu H, Sang Z, et al. Versatile and multivalent nanobodies efficiently neutralize SARS-CoV-2. *Science.* 2020;370(6523):1479–1484. doi:10.1126/science.abe4747.
5. Wrapp D, De Vlieger D, Corbett KS, Torres GM, Wang N, et al. Structural basis for potent neutralization of betacoronaviruses by single-domain camelid antibodies. *Cell.* 2020;181(5):1004–1015. doi:10.1016/j.cell.2020.04.031.
6. Koenig PA, Das H, Liu H, Kümmerer BM, Gohr FN, et al. Structure-guided multivalent nanobodies block SARS-CoV-2 infection and suppress mutational escape. *Science.* 2021;371(6530):eabe6230. doi:10.1126/science.abe6230.
7. Dejnirattisai W, Zhou D, Ginn HM, Duyvesteyn HM, Supasa P, et al. The antigenic anatomy of SARS-CoV-2 receptor binding domain. *Cell.* 2021;doi:10.1016/j.cell.2021.02.032.
