# Supplementary material for: Epitope profiling using computational structural modelling demonstrated on coronavirus-binding antibodies
Source: PubMed Central journal article supplement (PMC8700021; doi:10.1371/journal.pcbi.1009675), 2021-12-13
Supplement: pcbi.1009675.s004.pdf [file pcbi.1009675.s004.pdf]

| Epitope Group  | No. of Group Members | Average No. of Epitope Residues (min, max) | Number Of Unique Epitope Residues Across Group | Min Residue Overlap Between Any Two Group Members | Max Residue Overlap Between Any Two Group Members | Average Residue Overlap Between Any Two Group Members | No. of Residues Present In The Epitope of All Group Members | No. of Residues Present In The Epitope of 90%+ of Group Members | No. of Residues Present In The Epitope of 50%+ of Group Members |
|----------------|----------------------|--------------------------------------------|------------------------------------------------|---------------------------------------------------|---------------------------------------------------|-------------------------------------------------------|-------------------------------------------------------------|-----------------------------------------------------------------|-----------------------------------------------------------------|
| Neck           | 23                   | 31.9 (19, 38)                              | 49                                             | 7                                                 | 34                                                | 27.2                                                  | 5                                                           | 23                                                              | 32                                                              |
| Left Shoulder  | 10                   | 20.3 (13, 26)                              | 69                                             | 1                                                 | 19                                                | 7.9                                                   | 0                                                           | 1                                                               | 16                                                              |
| Left Flank     | 5                    | 25.4 (22, 28)                              | 62                                             | 4                                                 | 23                                                | 10.8                                                  | 3                                                           | 3                                                               | 22                                                              |
| Right Flank    | 2                    | 22.5 (21, 24)                              | 39                                             | 6                                                 | 6                                                 | 6                                                     | 6                                                           | 6                                                               | 39                                                              |
| Right Shoulder | 6                    | 21.8 (13, 27)                              | 56                                             | 2                                                 | 18                                                | 9.7                                                   | 1                                                           | 1                                                               | 20                                                              |
| Shoulder       | 2                    | 23.0 (21, 25)                              | 29                                             | 17                                                | 17                                                | 17                                                    | 17                                                          | 17                                                              | 17                                                              |

**S3 Table. SARS-CoV-2 binding antibodies epitope interactions.** Analysis of structural epitope overlap between epitope group members. Epitope residues were defined as those within 4.5Å of the antibody in the crystal structure. Analysis was conducted using Arpeggio [1].

## References

1. Jubb HC, Higuero AP, Ochoa-Montano B, Pitt WR, Ascher DB, et al. Arpeggio: a web server for calculating and visualising interatomic interactions in protein structures. *J Mol Biol.* 2017;429(3):365–371. doi:10.1016/j.jmb.2016.12.004.
