# Supplementary material for: Epitope profiling using computational structural modelling demonstrated on coronavirus-binding antibodies
Source: PubMed Central journal article supplement (PMC8700021; doi:10.1371/journal.pcbi.1009675), 2021-12-13
Supplement: pcbi.1009675.s005.pdf [file pcbi.1009675.s005.pdf]

| Antibody       | Van der Waals | Hydrogen Bond | Weak Hydrogen Bond | Ionic      | Aromatic   | Hydrophobic | Carbonyl   | Polar       | Weak Polar  |
|----------------|---------------|---------------|--------------------|------------|------------|-------------|------------|-------------|-------------|
| B38            | 9             | 20            | 13                 | 0          | 3          | 34          | 1          | 33          | 13          |
| Bamlanivimab   | 5             | 11            | 3                  | 7          | 10         | 59          | 1          | 10          | 3           |
| BD-236         | 9             | 13            | 13                 | 1          | 1          | 27          | 0          | 22          | 16          |
| BD-368-2       | 5             | 14            | 13                 | 0          | 5          | 26          | 1          | 25          | 16          |
| BD-604         | 6             | 15            | 14                 | 0          | 0          | 27          | 1          | 23          | 9           |
| BD-629         | 5             | 13            | 9                  | 0          | 7          | 25          | 1          | 23          | 15          |
| C102           | 9             | 13            | 6                  | 0          | 16         | 33          | 0          | 20          | 18          |
| C1A-B3         | 9             | 16            | 14                 | 1          | 4          | 26          | 0          | 26          | 12          |
| C1A-B12        | 5             | 17            | 12                 | 1          | 4          | 36          | 1          | 23          | 14          |
| C1A-C2         | 13            | 22            | 15                 | 1          | 8          | 36          | 1          | 29          | 14          |
| C1A-F10        | 11            | 17            | 11                 | 1          | 6          | 33          | 1          | 23          | 16          |
| CB6            | 11            | 15            | 10                 | 2          | 7          | 38          | 0          | 19          | 14          |
| CC12.1         | 19            | 22            | 18                 | 2          | 7          | 38          | 0          | 30          | 26          |
| CC12.3         | 7             | 11            | 15                 | 0          | 8          | 33          | 0          | 18          | 13          |
| COVA1-16       | 9             | 8             | 8                  | 0          | 0          | 23          | 1          | 12          | 17          |
| COVA2-04       | 10            | 14            | 14                 | 1          | 4          | 31          | 0          | 20          | 12          |
| COVA2-39       | 8             | 7             | 8                  | 0          | 10         | 48          | 0          | 13          | 18          |
| COVOX-150      | 11            | 21            | 12                 | 4          | 5          | 39          | 2          | 33          | 17          |
| COVOX-158      | 10            | 16            | 15                 | 0          | 5          | 19          | 0          | 21          | 13          |
| COVOX-253      | 3             | 8             | 5                  | 0          | 8          | 36          | 1          | 9           | 4           |
| COVOX-253H55L  | 8             | 7             | 6                  | 0          | 11         | 39          | 1          | 9           | 6           |
| COVOX-269      | 17            | 20            | 13                 | 2          | 6          | 36          | 2          | 30          | 17          |
| COVOX-316      | 4             | 4             | 3                  | 0          | 11         | 52          | 0          | 11          | 5           |
| COVOX-384      | 4             | 7             | 3                  | 4          | 3          | 38          | 0          | 9           | 5           |
| COVOX-45       | 6             | 16            | 11                 | 8          | 5          | 39          | 1          | 20          | 19          |
| COVOX-75       | 13            | 9             | 9                  | 0          | 1          | 36          | 0          | 11          | 10          |
| COVOX-88       | 10            | 9             | 1                  | 4          | 10         | 37          | 0          | 12          | 13          |
| CR3022         | 9             | 13            | 13                 | 10         | 0          | 35          | 0          | 14          | 11          |
| CV07-250       | 3             | 14            | 9                  | 0          | 11         | 34          | 0          | 16          | 9           |
| CV07-270       | 9             | 12            | 5                  | 9          | 6          | 37          | 1          | 15          | 9           |
| CV30           | 10            | 14            | 11                 | 0          | 0          | 23          | 0          | 22          | 11          |
| EY6A           | 11            | 7             | 8                  | 1          | 3          | 34          | 1          | 11          | 15          |
| Fab.15033-7    | 8             | 10            | 9                  | 4          | 11         | 36          | 0          | 13          | 15          |
| Fab-298        | 1             | 6             | 2                  | 0          | 1          | 20          | 0          | 10          | 6           |
| Fab-52         | 6             | 3             | 5                  | 2          | 2          | 34          | 0          | 5           | 10          |
| Fab2-15        | 6             | 4             | 5                  | 0          | 10         | 27          | 0          | 6           | 16          |
| LY-CoV481      | 14            | 13            | 15                 | 0          | 2          | 21          | 0          | 21          | 13          |
| LY-CoV488      | 8             | 19            | 9                  | 3          | 3          | 22          | 1          | 29          | 15          |
| MW06           | 7             | 9             | 15                 | 0          | 3          | 17          | 4          | 14          | 18          |
| P2B-2F6        | 4             | 4             | 3                  | 2          | 2          | 16          | 0          | 7           | 8           |
| P2C-1A3        | 16            | 8             | 8                  | 0          | 13         | 52          | 0          | 11          | 15          |
| P2C-1F11       | 8             | 11            | 11                 | 0          | 2          | 27          | 0          | 21          | 14          |
| P4A1           | 16            | 20            | 13                 | 1          | 4          | 33          | 1          | 28          | 16          |
| Regdanvimab    | 9             | 8             | 5                  | 7          | 15         | 57          | 0          | 11          | 3           |
| S2H14          | 8             | 13            | 13                 | 0          | 0          | 2           | 0          | 17          | 17          |
| S304           | 9             | 10            | 12                 | 0          | 3          | 36          | 1          | 16          | 12          |
| S309           | 6             | 12            | 7                  | 2          | 0          | 43          | 1          | 14          | 14          |
| STE90-C11      | 5             | 14            | 10                 | 1          | 7          | 38          | 0          | 22          | 14          |
| <i>Average</i> | <i>8.5</i>    | <i>12.3</i>   | <i>9.6</i>         | <i>1.7</i> | <i>5.5</i> | <i>33.1</i> | <i>0.5</i> | <i>17.9</i> | <i>12.8</i> |

**S4 Table. SARS-CoV-2 binding antibodies paratope interactions.** Analysis of the paratope-epitope interactions between antibody and SARS-CoV-2 RBD in the cocrystal structures, determined using Arpeggio [1].

## References

1. Jubb HC, Higuero AP, Ochoa-Montano B, Pitt WR, Ascher DB, et al. Arpeggio: a web server for calculating and visualising interatomic interactions in protein structures. *J Mol Biol.* 2017;429(3):365–371. doi:10.1016/j.jmb.2016.12.004.
